# Supplementary material for: KEAP1/NRF2 Mutations in Stem Cells Define an Aggressive Subset of Head and Neck Cancer Patients Who Have a Poor Prognosis, Lung Metastasis, and Therapeutic Failure
Source: MDPI journal article supplement (doi:10.3390/cancers15205006), 2023-10-16
Supplement: s1 [file s1]

| Supplementary Table S1. Primers used in PCR amplifications from FFPE tumor sections for Sanger sequencing. |       |             |                         |                    |
|------------------------------------------------------------------------------------------------------------|-------|-------------|-------------------------|--------------------|
| Primer                                                                                                     | Gene  | Coding Exon | Sequence                | Amplicon size (bp) |
| KEAP1Ex1F                                                                                                  | KEAP1 | 1           | cctcatccagccctgtcttc    | 303                |
| KEAP1Ex1R                                                                                                  |       |             | ctcgatcacgtagaagacctt   |                    |
| KEAP1Ex2-2F                                                                                                | KEAP1 | 2           | caaggactacctggcgaagtc   | 302                |
| KEAP1Ex2-2R                                                                                                |       |             | gggtgtaacagtcaggggc     |                    |
| KEAP1Ex3F                                                                                                  | KEAP1 | 3           | tccacgaaggcagctataatgg  | 254                |
| KEAP1Ex3R                                                                                                  |       |             | gcttcggatgggttcattgc    |                    |
| KEAP1Ex4F                                                                                                  | KEAP1 | 4           | gagtcaccttctctgcatgg    | 248                |
| KEAP1Ex4R                                                                                                  |       |             | gatgggctagtcaggactctt   |                    |
| KEAP1Ex5F                                                                                                  | KEAP1 | 5           | gctgcatctctctttctgtc    | 239                |
| KEAP1Ex5R                                                                                                  |       |             | gtacagttctgctggcgaac    |                    |
| NRF2Ex2F                                                                                                   | NRF2  | 2           | accatcaacagtggcataatgtg | 397                |
| NRF2Ex2R                                                                                                   |       |             | ctgccataacttccaagaac    |                    |
