# Supplementary material for: KEAP1/NRF2 Mutations in Stem Cells Define an Aggressive Subset of Head and Neck Cancer Patients Who Have a Poor Prognosis, Lung Metastasis, and Therapeutic Failure
Source: MDPI journal article supplement (doi:10.3390/cancers15205006), 2023-10-16
Supplement: s1 [file s1]

**Supplementary Table S2: List of *Keap1* and *Nrf2* mutations detected in 50 head and neck cancer patient.**

| <b>Patient no.</b> | <b>Tumor size, cm.</b> | <b>N-stage</b> | <b>T-stage</b> | <b>Clinical stage</b> | <b>Tumor mutations</b>                                | <b>HPV status</b> |
|--------------------|------------------------|----------------|----------------|-----------------------|-------------------------------------------------------|-------------------|
| Patient # 1        | 4.2                    | N3             | T4             | III                   | c.403C>T ( <i>Keap1</i> )<br>With HN-CSC mutation     | -                 |
| Patient # 2        | 3.6                    | N3             | T3             | III                   | c.1111G>A ( <i>Keap1</i> )<br>With HN-CSC mutation    | -                 |
| Patient # 3        | 2.8                    | N2             | T3             | IV                    | c.1129G>A ( <i>Keap1</i> )<br>With HN-CSC mutation    | -                 |
| Patient # 4        | 3.1                    | N1             | T2             | III                   | c.1766A>G ( <i>Keap1</i> )<br>With-HN-CSC mutation    | -                 |
| Patient # 5        | 3.7                    | N2             | T2             | III                   | c.474T>C ( <i>Keap1</i> )<br>With HN-CSC mutation     | -                 |
| Patient # 6        | 2.7                    | N3             | T2             | IV                    | c.1152C>T ( <i>Keap1</i> )<br>Without HN-CSC mutation | -                 |
| Patient # 7        | 4.1                    | N2             | T4             | IV                    | c.1413C>G ( <i>Keap1</i> )<br>With-HN-CSC mutation    | -                 |
| Patient # 8        | 3.2                    | N3             | T2             | IV                    | c.1161C>T ( <i>Keap1</i> )<br>With HN-CSC mutation    | -                 |
| Patient # 9        | 2.2                    | N2             | T3             | III                   | c.1815C>T ( <i>Keap1</i> )<br>With HN-CSC mutation    | -                 |
| Patient # 10       | 2.1                    | N1             | T4             | IV                    | c.241G>C ( <i>Nrf2</i> )<br>With HN-CSC mutation      | -                 |
| Patient # 11       | 3.4                    | N1             | T2             | IV                    | c.145G>A ( <i>Nrf2</i> )<br>Without HN-CSC mutation   | -                 |
| Patient # 12       | 4.6                    | N3             | T3             | IV                    | c.165C>T ( <i>Nrf2</i> )<br>With HN-CSC mutation      | -                 |
| Patient # 13       | 2.2                    | N2             | T3             | III                   | c.162G>A ( <i>Nrf2</i> )<br>With HN-CSC mutation      | -                 |
| Patient # 14       | 1.5                    | N0             | T1             | III                   | Mutation not detected                                 | -                 |
| Patient # 15       | 2.1                    | N1             | T1             | II                    | Mutation not detected                                 | -                 |
| Patient # 16       | 1.6                    | N1             | T2             | III                   | Mutation not detected                                 | -                 |
| Patient # 17       | 3.1                    | N2             | T1             | III                   | Mutation not detected                                 | -                 |
| Patient # 18       | 1.3                    | N1             | T4             | IV                    | Mutation not detected                                 | -                 |
| Patient # 19       | 1.6                    | N2             | T3             | III                   | Mutation not detected                                 | -                 |
| Patient # 20       | 1.9                    | N0             | T1             | IV                    | Mutation not detected                                 | +                 |
| Patient # 21       | 2.1                    | N3             | T2             | IV                    | Mutation not detected                                 | +                 |
| Patient # 22       | 1.7                    | N2             | T1             | IV                    | Mutation not detected                                 | -                 |
| Patient # 23       | 3.2                    | N1             | T3             | III                   | Mutation not detected                                 | -                 |
| Patient # 24       | 1.5                    | N0             | T1             | IV                    | Mutation not detected                                 | -                 |
| Patient # 25       | 2.5                    | N2             | T1             | III                   | Mutation not detected                                 | -                 |
| Patient # 26       | 1.2                    | N3             | T2             | IV                    | Mutation not detected                                 | +                 |
| Patient # 27       | 2.2                    | N0             | T3             | IV                    | Mutation not detected                                 | -                 |
| Patient # 28       | 3.0                    | N0             | T1             | II                    | Mutation not detected                                 | -                 |
| Patient # 29       | 2.1                    | N2             | T1             | III                   | Mutation not detected                                 | -                 |
| Patient # 30       | 1.2                    | N0             | T2             | III                   | Mutation not detected                                 | -                 |
| Patient # 31       | 1.8                    | N3             | T2             | IV                    | Mutation not detected                                 | -                 |
| Patient # 32       | 2.0                    | N2             | T1             | IV                    | Mutation not detected                                 | -                 |

|              |     |    |    |     |                       |   |
|--------------|-----|----|----|-----|-----------------------|---|
| Patient # 33 | 2.1 | N2 | T3 | IV  | Mutation not detected | - |
| Patient # 34 | 3.1 | N0 | T1 | IV  | Mutation not detected | + |
| Patient # 35 | 2.4 | N1 | T2 | III | Mutation not detected | - |
| Patient # 36 | 3.0 | N1 | T1 | IV  | Mutation not detected | - |
| Patient # 37 | 1.7 | N3 | T1 | IV  | Mutation not detected | + |
| Patient # 38 | 2.8 | N1 | T2 | III | Mutation not detected | - |
| Patient # 39 | 1.1 | N1 | T2 | II  | Mutation not detected | - |
| Patient # 40 | 2.2 | N2 | T1 | IV  | Mutation not detected | + |
| Patient # 41 | 2.8 | N0 | T2 | III | Mutation not detected | - |
| Patient # 42 | 2.4 | N3 | T2 | III | Mutation not detected | - |
| Patient # 43 | 1.2 | N2 | T2 | IV  | Mutation not detected | - |
| Patient # 44 | 1.0 | N2 | T3 | IV  | Mutation not detected | + |
| Patient # 45 | 1.7 | N0 | T1 | III | Mutation not detected | + |
| Patient # 46 | 2.0 | N1 | T1 | IV  | Mutation not detected | + |
| Patient # 47 | 1.9 | N2 | T3 | IV  | Mutation not detected | + |
| Patient # 48 | 4.3 | N1 | T2 | III | Mutation not detected | - |
| Patient # 49 | 2.7 | N3 | T2 | IV  | Mutation not detected | + |
| Patient # 50 | 1.6 | N2 | T1 | III | Mutation not detected | + |
